# Supplementary material for: Hi-MC: a novel method for high-throughput mitochondrial haplogroup classification
Source: PeerJ. 2018 Jun 25;6:e5149. doi: 10.7717/peerj.5149 (PMC6022720; doi:10.7717/peerj.5149)
Supplement: Supplemental Information 1 [file peerj-06-5149-s001.xlsx]

## Sheet: Supplementary Table 1
Supplementary Table 1. List of mitochondrial SNPs on the custom panel associated with Hi-MC. For each SNP, the mito SNP ID, rs number (if avaialble), classifying allele, associated haplogroup, and references to the haplogrouping assignments (in PubMed IDs) are given. Note that the associated haplogroup shown is based on the reduced PhyloTree presented in Mitchell et al 2014 (PMID:24488180 and PMC…
Mito SNP ID	rs number	Classifying allele	Associated haplogroup	References
MT10115	rs3899188	C	L2	PMID:18853457
MT1018	rs2856982	G	L3	PMID:20707610; PMID:18853457
MT10398	rs2853826	G	K1	PMID:15234467; PMID:20707610
MT10400	rs28358278	T	M	PMID:21172459; PMID:20707610; PMID:18853457
MT10550	rs28358280	G	K	PMID:18853457
MT11177	rs28358284	T	B2	PMID:18853457
MT11251	rs3915952	G	JT	PMID:18853457
MT11719	rs2853495	G	R0	PMID:20707610; PMID:18853457
MT11947	rs28359168	G	W	PMID:18853457
MT12007	rs2853497	A	A2	PMID:18853457
MT12308	rs2853498	G	U	PMID:15234467; PMID:20707610; PMID:18853457
MT12414	-	C	N2	PMID:18853457
MT12705	-	C	R	PMID:21172459; PMID:20707610; PMID:18853457
MT13263	rs28359175	G	C	PMID:21172459; PMID:18853457
MT13368	rs3899498	A	T	PMID:15234467; PMID:18853457
MT13506	rs2857287	C	L2'3'4'6	PMID:18853457
MT13708	rs28359178	A	J	PMID:15234467; PMID:21172459; PMID:18853457
MT13789	rs28359179	C	L1	PMID:20707610; PMID:18853457
MT14178	rs28357671	C	L1	PMID:20707610; PMID:18853457
MT14318	rs28357675	C	C	PMID:20707610; PMID:18853457
MT1438	rs2001030	A	H2	PMID:20707610; PMID:18853457
MT14470	-	C	K	PMID:20707610; PMID:21172459; PMID:18853457
MT14560	rs28357676			PMID:18853457
MT14668	rs28357678	T	D4	PMID:18853457
MT14766	rs3135031	C	HV	PMID:21172459; PMID:20707610; PMID:18853457
MT14905	rs28357682	A	T	PMID:18853457
MT15043	rs28357684	A	N1a1b	PMID:20707610; PMID:18853457
MT15326	-	A	H2a2a	PMID:18853457
MT15452	rs3088309	A	JT	PMID:18853457
MT15535	rs28357371	T	B4b'd'e	PMID:20707610; PMID:18853457
MT16111	-	T	A2	PMID:20707610; PMID:18853457
MT16189	-	C	T1	PMID:18853457
MT16271	-	C	JT	PMID:18853457
MT16362	-	C	L4	PMID:18853457
MT16390	-	A	L2	PMID:18853457
MT16391	rs34301918	A	I	PMID:15234467; PMID:18853457
MT16391	-	A	I	PMID:18853457
MT1719	rs3928305	A	X2	PMID:15234467; PMID:21172459; PMID:18853457
MT1736	rs28358574	G	A	PMID:20707610; PMID:21172459; PMID:18853457
MT2092	-	T	D1	PMID:20707610; PMID:18853457
MT3505	rs28358585	G	W	PMID:18853457
MT3552	rs28358587	A	C	PMID:18853457
MT3594	rs2854134	C	L3'4	PMID:20707610; PMID:18853457
MT4580	rs28357975	A	V	PMID:15234467; PMID:20707610; PMID:21172459; PMID:18853457
MT4769	-	A	H2a	PMID:20707610; PMID:18853457
MT4883	-	T	M80'D	PMID:21172459; PMID:18853457
MT4917	rs28357980	G	T	PMID:20707610; PMID:18853457
MT4977	rs28357981	C	B2	PMID:18853457
MT5178	rs28357984	A	D	PMID:20707610; PMID:18853457
MT5442	rs3020601	C	L0	PMID:20707610; PMID:21172459; PMID:18853457
MT6371	-	T	X	PMID:18853457
MT7028	rs2015062	C	H	PMID:15234467; PMID:20707610; PMID:21172459; PMID:18853457
MT825	rs2853520	T	L2'3'4'6	PMID:18853457
MT8251	rs3021089	A	N1a1b	PMID:15234467; PMID:21172459; PMID:18853457
MT8414	rs28358884	T	D4	PMID:18853457
MT8468	rs1116907	C	L2'3'4'6	PMID:18853457
MT8703	-	T	D2	PMID:18853457
MT9042	rs3020605	T	L0	PMID:18853457
MT9055	rs9645429	A	U8b	PMID:15234467; PMID:21172459
MT9347	rs2853824	G	L0	PMID:20707610; PMID:18853457
MT9950	rs3134801	C	B2	PMID:20707610; PMID:18853457

## Sheet: Supplementary Table 2
Supplementary Table 3. Assay design for mitcohondrial SNP data. These assays were designed for Sequenom genotyping in the PAGE I Study (see Mitchell et al 2014; PMID:24488180) for details.
POOL 1
Termination mix	SNP_ID	Secondary amplication primer (includes secondary tag)	Primary amplification primer (includes primer tag)	Amplicon length (in bases; includes primer tags and maximum SNP sequence length)	Uniplex amplifications score (indicates how well the multiplexed amplicon design meets the design criteria)	Multiplex amplifications score (indicates how well the multiplexed amplicon design meets the design criteria)	Extend primer melting temperature (calculated by Nearest Neighbor method)	Percent GC content of the extned primer	Assay design warning codes (A/a = amplicon length; D/d = primer- dimer potential between primers of multiplexed assays; E/e = MBE primer extension length; G/g = primer subsequence of contiguous G nucleotides; H/h = primer hairpin or self-dimer potential; L/l = primer length; M/m = multiSNP assay design; P/p = spectral peak separation; S/s = false priming potential; T/t = primer hybridization Tm);…	Direction of MassEXTEND (F=Forward; R=Reverse)	Extend primer mass	Extend primer sequence	Name given to the analyte 1 mass peak in the mass spectrum. It defaults to the SNP sequence alternative producing this analyte.	Mass of analyte 1	Sequence of analyte 1	Name given to the analyte 2 mass peak in the mass spectrum	Mass of analyte 2	Sequence of analyte 2	Name given to the analyte 3 mass peak in the mass spectrum	Mass of analyte 3	Sequence of analyte 3	Name given to the analyte 4 mass peak in the mass spectrum	Mass of analyte	Sequence of analyte 4
iPLEX	12308	ACGTTGGATGGGTTATAGTAGTGTGCATGG	ACGTTGGATGCAGCTATCCATTGGTCTTAG	100	97.1	98.7	45.7	41.2		R	5218.4	GGAGTTGCACCAAAATT	G	5465.6	GGAGTTGCACCAAAATTC	A	5545.5	GGAGTTGCACCAAAATTT
iPLEX	13368	ACGTTGGATGGTTCATTGTTAAGGTTGTGG	ACGTTGGATGTCTGTACCCACGCCTTCTTC	95	92.9	98.7	47.9	47.1		R	5345.5	AGGTTGTGGATGATGGA	G	5592.7	AGGTTGTGGATGATGGAC	A	5672.6	AGGTTGTGGATGATGGAT
iPLEX	9055	ACGTTGGATGGTGTAGAGGGAAGGTTAATG	ACGTTGGATGATTACTGCAGGCCACCTACT	99	97.3	98.7	47.9	47.4		R	5929.9	GTTGATATTGCTAGGGTGG	G	6177	GTTGATATTGCTAGGGTGGC	A	6257	GTTGATATTGCTAGGGTGGT
iPLEX	8251	ACGTTGGATGTTTACAGTGGGCTCTAGAGG	ACGTTGGATGGCCCATCGTCCTAGAATTAA	118	88.6	98.7	48.9	45		R	6221.1	TGCTATAGGGTAAATACGGG	G	6468.2	TGCTATAGGGTAAATACGGGC	A	6548.2	TGCTATAGGGTAAATACGGGT
iPLEX	4580	ACGTTGGATGTTCTGTGGAACGAGGGTTTA	ACGTTGGATGGCTAAGCTCGCACTGATTTT	120	83.1	98.7	45	33.3	h	R	6511.3	TAGAACTGGAATAAAAGCTAG	G	6758.5	TAGAACTGGAATAAAAGCTAGC	A	6838.4	TAGAACTGGAATAAAAGCTAGT
iPLEX	13708	ACGTTGGATGGAGAAATCCTGCGAATAGGC	ACGTTGGATGCGAAAATAACCCCACCCTAC	90	93.3	98.7	60.4	63.6		R	6727.4	CCTGCGAATAGGCTTCCGGCTG	G	6974.5	CCTGCGAATAGGCTTCCGGCTGC	A	7054.5	CCTGCGAATAGGCTTCCGGCTGT
iPLEX	1719	ACGTTGGATGACTCCACCTTACTACCAGAC	ACGTTGGATGGCCAGGTTTCAATTTCTATCG	98	94.5	98.7	51.9	43.5		F	6896.5	CACCTTACTACCAGACAACCTTA	A	7167.7	CACCTTACTACCAGACAACCTTAA	G	7183.7	CACCTTACTACCAGACAACCTTAG
iPLEX	10398	ACGTTGGATGGAGTCGAAATCATTCGTTTTG	ACGTTGGATGTCTGGCCTATGAGTGACTAC	101	87.9	98.7	45.3	30.4		R	7021.6	GTTTAAACTATATACCAATTCGG	G	7268.8	GTTTAAACTATATACCAATTCGGC	A	7348.7	GTTTAAACTATATACCAATTCGGT
iPLEX	16391	ACGTTGGATGATTGATTTCACGGAGGATGG	ACGTTGGATGCAGTCAAATCCCTTCTCGTC	99	98.6	98.7	61	60.9		R	7218.7	CACGGAGGATGGTGGTCAAGGGA	G	7465.9	CACGGAGGATGGTGGTCAAGGGAC	A	7545.8	CACGGAGGATGGTGGTCAAGGGAT
iPLEX	7028	ACGTTGGATGAGTGAATGAAGCCTCCTATG	ACGTTGGATGGACATCGTACTACACGACAC	117	97.4	98.7	49.9	37.5		R	7495.9	TATTGATAGGACATAGTGGAAGTG	T	7767.1	TATTGATAGGACATAGTGGAAGTGA	C	7783.1	TATTGATAGGACATAGTGGAAGTGG
iPLEX	4917	ACGTTGGATGCCCCATCTCAATCATATACC	ACGTTGGATGGATGGATAAGATTGAGAGAG	96	90.6	98.7	53.2	37		F	8082.3	ATCATATACCAAATCTCTCCCTCACTA	A	8353.5	ATCATATACCAAATCTCTCCCTCACTAA	G	8369.5	ATCATATACCAAATCTCTCCCTCACTAG
POOL 2
iPLEX	3552	ACGTTGGATGCCCCGACCTTAGCTCTCAC	ACGTTGGATGTAGGTTGAGGTTGACCAGG	100	88.5	73.8	48.3	60	d	F	4472.9	AGCTCTCACCATCGC	C	4720.1	AGCTCTCACCATCGCC	A	4744.1	AGCTCTCACCATCGCA	T	4800	AGCTCTCACCATCGCT
iPLEX	28358284	ACGTTGGATGAGGAAGTATGTGCCTGCGTT	ACGTTGGATGCCACACTTATCCCCACCTTG	99	97.3	73.8	47.2	60	dh	R	4575	CGTTCAGGCGTTCTG	T	4846.2	CGTTCAGGCGTTCTGA	C	4862.2	CGTTCAGGCGTTCTGG
iPLEX	16390	ACGTTGGATGATTGATTTCACGGAGGATGG	ACGTTGGATGCAGTCAAATCCCTTCTCGTC	99	98.6	73.8	47.8	60	Dh	R	4673	TGGTGGTCAAGGGAC	G	4920.2	TGGTGGTCAAGGGACC	A	5000.1	TGGTGGTCAAGGGACT
iPLEX	28358574	ACGTTGGATGACTACCAGACAACCTTAGCC	ACGTTGGATGTATCTATTGCGCCAGGTTTC	98	98.5	73.8	47.8	47.1	d	F	5083.3	GCCAAACCATTTACCCA	A	5354.5	GCCAAACCATTTACCCAA	G	5370.5	GCCAAACCATTTACCCAG
iPLEX	2856982	ACGTTGGATGCCAGTTTGGGTCTTAGCTAT	ACGTTGGATGAAAAAACTCCAGTTGACAC	101	83.4	73.8	46.1	41.2	D	R	5169.4	AAAGCCACTTTCGTAGT	G	5416.6	AAAGCCACTTTCGTAGTC	A	5496.5	AAAGCCACTTTCGTAGTT
iPLEX	2853520	ACGTTGGATGACACCCCCACGGGAAACAG	ACGTTGGATGAACCCTGGGGTTAGTATAGC	98	86.6	73.8	49.9	52.9	Dg	F	5268.4	CGGGAAACAGCAGTGAT	A	5539.7	CGGGAAACAGCAGTGATA	T	5595.5	CGGGAAACAGCAGTGATT
iPLEX	5178	ACGTTGGATGTTAAACTCCAGCACCACGAC	ACGTTGGATGGGTGGATGGAATTAAGGGTG	101	98.7	73.8	50.2	50		F	5452.6	TCTCGCACCTGAAACAAG	C	5699.8	TCTCGCACCTGAAACAAGC	A	5723.8	TCTCGCACCTGAAACAAGA	T	5779.7	TCTCGCACCTGAAACAAGT
iPLEX	3020601	ACGTTGGATGCAGTTTGAACATACAAAACCC	ACGTTGGATGAGATAGGTAGGAGTAGCGTG	93	90	73.8	48.2	53.3		F	5630.7	ttccACAAAACCCACCCCA	C	5877.9	ttccACAAAACCCACCCCAC	T	5957.8	ttccACAAAACCCACCCCAT
iPLEX	12414	ACGTTGGATGCCATCCTTACCACCCTCGT	ACGTTGGATGAAAGGTGGATGCGACAATGG	100	93.5	73.8	45.7	60	D	F	5667.7	ttaaCACCCTCGTTAACCC	C	5914.9	ttaaCACCCTCGTTAACCCC	T	5994.8	ttaaCACCCTCGTTAACCCT
iPLEX	14470	ACGTTGGATGTGCCTCAGGATACTCCTCAA	ACGTTGGATGTTTAGGGGGAATGATGGTTG	87	64.5	73.8	47.5	44.4	G	F	5811.8	aAGCCATCGCTGTAGTATA	C	6059	aAGCCATCGCTGTAGTATAC	T	6138.9	aAGCCATCGCTGTAGTATAT
iPLEX	3135031	ACGTTGGATGACAAGAACACCAATGACCCC	ACGTTGGATGGGGAGGTCGATGAATGAGTG	97	98.5	73.8	47.7	47.1	D	F	6097	aagGACCCCAATACGCAAAA	C	6344.2	aagGACCCCAATACGCAAAAC	T	6424.1	aagGACCCCAATACGCAAAAT
iPLEX	2853495	ACGTTGGATGGCGCAGTCATTCTCATAATC	ACGTTGGATGCGTTCGTAGTTTGAGTTTGC	96	97.1	73.8	46.7	60	d	F	6104	aaaagCATAATCGCCCACGG	A	6375.2	aaaagCATAATCGCCCACGGA	G	6391.2	aaaagCATAATCGCCCACGGG
iPLEX	2001030	ACGTTGGATGCTACGATAGCCCTTATGAAAC	ACGTTGGATGCCCTGTTCAACTAAGCACTC	100	94.5	73.8	47.9	40	Dh	F	6196	GGTGGATTTAGCAGTAAACT	A	6467.3	GGTGGATTTAGCAGTAAACTA	G	6483.3	GGTGGATTTAGCAGTAAACTG
iPLEX	28359179	ACGTTGGATGAACAACATTTCCCCCGCATC	ACGTTGGATGTAGGAAAGTGACAGCGAGGG	101	97.3	73.8	47	47.1	D	F	6294.1	gtttAAACAACAATCCCCCTC	C	6541.3	gtttAAACAACAATCCCCCTCC	T	6621.2	gtttAAACAACAATCCCCCTCT
iPLEX	13263	ACGTTGGATGAAAATCGTAGCCTTCTCCAC	ACGTTGGATGATGCTAGGTGTGGTTGGTTG	99	98.6	73.8	54.2	47.6	D	F	6301.1	AGCCTTCTCCACTTCAAGTCA	A	6572.3	AGCCTTCTCCACTTCAAGTCAA	G	6588.3	AGCCTTCTCCACTTCAAGTCAG
iPLEX	2853497	ACGTTGGATGAGCCCTATACTCCCTCTACA	ACGTTGGATGTGTTGTTAATGTGGTGGGTG	88	96.8	73.8	47.5	31.8	d	F	6655.4	ACATATTTACCACAACACAATG	A	6926.6	ACATATTTACCACAACACAATGA	G	6942.6	ACATATTTACCACAACACAATGG
iPLEX	28358585	ACGTTGGATGACGCCATAAAACTCTTCACC	ACGTTGGATGAAGGTCGGGGCGGTGATGTA	99	86.7	73.8	48.9	47.1	g	F	6713.4	ggggaTAAAACCCGCCACATCT	A	6984.6	ggggaTAAAACCCGCCACATCTA	G	7000.6	ggggaTAAAACCCGCCACATCTG
iPLEX	15326	ACGTTGGATGCCTTTCACTTCATCTTGCCC	ACGTTGGATGTTGATCCCGTTTCGTGCAAG	98	100	73.8	48.7	47.1	dsH	F	6775.4	gggagTTATTGCAGCCCTAGCA	A	7046.6	gggagTTATTGCAGCCCTAGCAA	G	7062.6	gggagTTATTGCAGCCCTAGCAG
iPLEX	28358884	ACGTTGGATGTATGGCCCACCATAATTACC	ACGTTGGATGGTGGTAGTTTGTGTTTAATA	100	77.2	73.8	51.9	47.6		F	6847.5	ttCCCACCATAATTACCCCCATA	C	7094.7	ttCCCACCATAATTACCCCCATAC	T	7174.6	ttCCCACCATAATTACCCCCATAT
iPLEX	28357371	ACGTTGGATGGCGACCCAGACAATTATACC	ACGTTGGATGGGAAATATCATTCGGGCTTG	92	98.3	73.8	54	50		F	6882.5	ccgACCCTAGCCAACCCCTTAAA	C	7129.7	ccgACCCTAGCCAACCCCTTAAAC	T	7209.6	ccgACCCTAGCCAACCCCTTAAAT
iPLEX	16319	ACGTTGGATGAACCTACCCACCCTTAACAG	ACGTTGGATGGACGAGAAGGGATTTGACTG	100	100	73.8	46	29.2		F	7312.8	CCTTAACAGTACATAGTACATAAA	A	7584	CCTTAACAGTACATAGTACATAAAA	G	7600	CCTTAACAGTACATAGTACATAAAG
iPLEX	2092	ACGTTGGATGTCCTAGTGTCCAAAGAGCTG	ACGTTGGATGTTGCCCACAGAACCCTCTAA	97	98.7	73.8	46.9	42.1	D	R	7359.8	gggcgGTTCCTCTTTGGACTAACA	T	7631	gggcgGTTCCTCTTTGGACTAACAA	C	7647	gggcgGTTCCTCTTTGGACTAACAG
iPLEX	3899188	ACGTTGGATGTAATCAACACCCTCCTAGCC	ACGTTGGATGTCTATGTAGCCGTTGAGTTG	93	98.4	73.8	49	37.5		F	7510.9	tCCTCCTAGCCTTACTACTAATAAT	C	7758.1	tCCTCCTAGCCTTACTACTAATAATC	T	7838	tCCTCCTAGCCTTACTACTAATAATT
iPLEX	12705	ACGTTGGATGCAGACCCAAACATTAATCAG	ACGTTGGATGGGTTGTTAGCGGTAACTAAG	101	90.6	73.8	48.1	28		F	7549.9	ATCAGTTCTTCAAATATCTACTCAT	C	7797.1	ATCAGTTCTTCAAATATCTACTCATC	T	7877	ATCAGTTCTTCAAATATCTACTCATT
iPLEX	28358278	ACGTTGGATGGAGTCGAAATCATTCGTTTTG	ACGTTGGATGTCTGGCCTATGAGTGACTAC	101	87.9	73.8	45.5	23.1		R	7909.2	GTTTTGTTTAAACTATATACCAATTC	T	8180.4	GTTTTGTTTAAACTATATACCAATTCA	C	8196.4	GTTTTGTTTAAACTATATACCAATTCG
iPLEX	16111	ACGTTGGATGACCCATCAACAACCGCTATG	ACGTTGGATGGGTCAAGTATTTATGGTACCG	99	94.5	73.8	49.3	40.9	h	F	7985.2	agagGTATTTCGTACATTACTGCCAG	C	8232.4	agagGTATTTCGTACATTACTGCCAGC	A	8256.4	agagGTATTTCGTACATTACTGCCAGA	G	8272.4	agagGTATTTCGTACATTACTGCCAGG	T	8312.3	agagGTATTTCGTACATTACTGCCAGT
iPLEX	4883	ACGTTGGATGCCTGCTTCTTCTCACATGAC	ACGTTGGATGTTACGTTTAGTGAGGGAGAG	94	98.4	73.8	53.6	45.5	d	F	8132.3	cctttTCACATGACAAAAACTAGCCCC	C	8379.5	cctttTCACATGACAAAAACTAGCCCCC	T	8459.4	cctttTCACATGACAAAAACTAGCCCCT
iPLEX	4769	ACGTTGGATGGAACCATAACCAATACTACC	ACGTTGGATGGGCTATTCCTAGTTTTATTGC	97	84	73.8	45.8	17.9		F	8497.6	ATCAATACTCATCATTAATAATCATAAT	A	8768.8	ATCAATACTCATCATTAATAATCATAATA	G	8784.8	ATCAATACTCATCATTAATAATCATAATG
POOL 3
iPLEX	2248727	ACGTTGGATGTTAGGAGTGGGACTTCTAGG	ACGTTGGATGTTTTACCACTCCAGCCTAGC	117	98.9	64.2	50.6	66.7		R	4488.9	GCCAGTGCCCTCCTA	T	4760.1	GCCAGTGCCCTCCTAA	C	4776.1	GCCAGTGCCCTCCTAG
iPLEX	16189	ACGTTGGATGCCATAAATACTTGACCACCTG	ACGTTGGATGAGGGTTGATTGCTGTACTTG	112	92.6	64.2	47.6	56.3	ds	F	4724.1	CCACATCAAAACCCCC	C	4971.3	CCACATCAAAACCCCCC	T	5051.2	CCACATCAAAACCCCCT
iPLEX	3020605	ACGTTGGATGGGTTGATATTGCTAGGGTGG	ACGTTGGATGCGCCTAACCGCTAACATTAC	95	99.9	64.2	46.8	50		R	4872.2	TGGCGCTTCCAATTAG	T	5143.4	TGGCGCTTCCAATTAGA	C	5159.4	TGGCGCTTCCAATTAGG
iPLEX	28358280	ACGTTGGATGGGAATACTAGTATATCGCTC	ACGTTGGATGTTGAGGGTTATGAGAGTAGC	118	91.8	64.2	47.7	50	D	F	5090.3	gATCGCTCACACCTCAT	A	5361.5	gATCGCTCACACCTCATA	G	5377.5	gATCGCTCACACCTCATG
iPLEX	16271	ACGTTGGATGGTACTGTTAAGGGTGGGTAG	ACGTTGGATGCACACATCAACTGCAACTCC	95	99.9	64.2	45.1	41.2	d	R	5222.4	AGGTTTGTTGGTATCCT	T	5493.6	AGGTTTGTTGGTATCCTA	C	5509.6	AGGTTTGTTGGTATCCTG
iPLEX	28357981	ACGTTGGATGTCCATCATAGCAGGCAGTTG	ACGTTGGATGGTGGGTAATTGAGGAGTATG	98	98.5	64.2	51.9	58.8	D	F	5315.5	CAGGCAGTTGAGGTGGA	C	5562.6	CAGGCAGTTGAGGTGGAC	T	5642.6	CAGGCAGTTGAGGTGGAT
iPLEX	6371	ACGTTGGATGCCGTAGACCTAACCATCTTC	ACGTTGGATGGTGATGAAATTGATGGCCCC	93	95.4	64.2	51.1	55.6		F	5459.6	ACACCTAGCAGGTGTCTC	C	5706.7	ACACCTAGCAGGTGTCTCC	T	5786.7	ACACCTAGCAGGTGTCTCT
iPLEX	2854134	ACGTTGGATGAGTAAACGGCTAGGCTAGAG	ACGTTGGATGTTCTACTATGAACCCCCCTC	116	99	64.2	51.3	55.6	D	R	5610.6	GAGGCCTAGGTTGAGGTT	T	5881.9	GAGGCCTAGGTTGAGGTTA	C	5897.9	GAGGCCTAGGTTGAGGTTG
iPLEX	28357684	ACGTTGGATGCCAATGGCGCCTCAATATTC	ACGTTGGATGCTGAGTAGAGAAATGATCCG	101	98.6	64.2	46	52.9		F	5739.7	ggCTCTTCCTACACATCGG	C	5986.9	ggCTCTTCCTACACATCGGC	A	6010.9	ggCTCTTCCTACACATCGGA	G	6026.9	ggCTCTTCCTACACATCGGG
iPLEX	28359168	ACGTTGGATGATAGGGCTGTGACTAGTATG	ACGTTGGATGTACTGGGAGAACTCTCTGTG	113	97.9	64.2	45.7	42.1	d	R	5833.8	TGACTAGTATGTTGAGTCC	G	6081	TGACTAGTATGTTGAGTCCC	A	6160.9	TGACTAGTATGTTGAGTCCT
iPLEX	3915952	ACGTTGGATGTGTTTAGTGAGCCTAGGGTG	ACGTTGGATGTTCTACACCCTAGTAGGCTC	96	99.9	64.2	47.9	42.1		R	5953.9	GGGTGTTGTGAGTGTAAAT	G	6201.1	GGGTGTTGTGAGTGTAAATC	A	6281	GGGTGTTGTGAGTGTAAATT
iPLEX	28357676	ACGTTGGATGAGCCTTCTCCTATTTATGGG	ACGTTGGATGAAACCCATATAACCTCCCCC	114	65.2	64.2	47.7	53.3	D	R	6116	cccccTGTTAGCGGTGTGGT	G	6363.1	cccccTGTTAGCGGTGTGGTC	A	6443.1	cccccTGTTAGCGGTGTGGTT
iPLEX	2853824	ACGTTGGATGGTTACATCGCGCCATCATTG	ACGTTGGATGACTTCCACTCCATAACGCTC	99	100	64.2	47.8	40		R	6249.1	ATGGTTAGTGTGTTGGTTAG	G	6496.2	ATGGTTAGTGTGTTGGTTAGC	A	6576.2	ATGGTTAGTGTGTTGGTTAGT
iPLEX	28357678	ACGTTGGATGCCCCATTACTAAACCCACAC	ACGTTGGATGCATTGGTCGTGGTTGTAGTC	97	100	64.2	48.5	33.3		F	6409.2	ACTCAACAGAAACAAAGCATA	C	6656.4	ACTCAACAGAAACAAAGCATAC	T	6736.3	ACTCAACAGAAACAAAGCATAT
iPLEX	28357682	ACGTTGGATGTGGGCGATTGATGAAAAGGC	ACGTTGGATGGATCCTCCAAATCACCACAG	101	100	64.2	54	57.9	D	R	6533.2	ctAGGCGTCTGGTGAGTAGTG	G	6780.4	ctAGGCGTCTGGTGAGTAGTGC	A	6860.3	ctAGGCGTCTGGTGAGTAGTGT
iPLEX	1116907	ACGTTGGATGTTTTATGGGCTTTGGTGAGG	ACGTTGGATGTACCCCCATACTCCTTACAC	111	98.1	64.2	46.4	50	D	R	6541.3	ccataTTTGGTGAGGGAGGTA	T	6812.5	ccataTTTGGTGAGGGAGGTAA	C	6828.5	ccataTTTGGTGAGGGAGGTAG
iPLEX	28357968	ACGTTGGATGGCCGTTTACTCAATCCTCTG	ACGTTGGATGATTGTTTGGGCTACTGCTCG	106	99.9	64.2	46.4	50	dH	F	6621.3	cttcCTCAATCCTCTGATCAGG	A	6892.5	cttcCTCAATCCTCTGATCAGGA	G	6908.5	cttcCTCAATCCTCTGATCAGGG
iPLEX	16362	ACGTTGGATGGCACATTACAGTCAAATCCC	ACGTTGGATGGCGGGATATTGATTTCACGG	114	97.8	64.2	45.9	47.1	d	F	6694.4	ggtaaAGTCAAATCCCTTCTCG	C	6941.6	ggtaaAGTCAAATCCCTTCTCGC	G	6981.6	ggtaaAGTCAAATCCCTTCTCGG	T	7021.5	ggtaaAGTCAAATCCCTTCTCGT
iPLEX	8703	ACGTTGGATGATCAGGTTCGTCCTTTAGTG	ACGTTGGATGTCAACAACCGACTAATCACC	113	96.5	64.2	51.1	39.1	d	R	7057.6	GTTCGTCCTTTAGTGTTGTGTAT	T	7328.8	GTTCGTCCTTTAGTGTTGTGTATA	C	7344.8	GTTCGTCCTTTAGTGTTGTGTATG
iPLEX	3134801	ACGTTGGATGCGCCTGATACTGGCATTTTG	ACGTTGGATGAGACCCTCATCAATAGATGG	90	98.2	64.2	45.4	38.9	Ds	F	7131.6	ggcttGCATTTTGTAGATGTGGT	C	7378.8	ggcttGCATTTTGTAGATGTGGTC	T	7458.7	ggcttGCATTTTGTAGATGTGGTT
iPLEX	28357675	ACGTTGGATGGGGTGAAAGAGTATGATGGG	ACGTTGGATGTCCCGAATCAACCCTGACC	117	94.9	64.2	45.5	36.8		R	7139.7	agttGTGGTTGTGGTAAACTTTA	T	7410.9	agttGTGGTTGTGGTAAACTTTAA	C	7426.9	agttGTGGTTGTGGTAAACTTTAG
iPLEX	28357671	ACGTTGGATGACATAACCTATTCCCCCGAG	ACGTTGGATGTGGGCGTTGATTAGTAGTGG	108	99.7	64.2	45.7	36.8	D	F	7249.7	tcccaCGAGCAATCTCAATTACAA	C	7496.9	tcccaCGAGCAATCTCAATTACAAC	T	7576.8	tcccaCGAGCAATCTCAATTACAAT
iPLEX	2857287	ACGTTGGATGCATTGGCAGCCTAGCATTAG	ACGTTGGATGTTGCGGTTTCGATGATGTGG	97	100	64.2	46.6	42.1	d	F	7293.8	ggtaaCTTTCCTCACAGGTTTCTA	C	7540.9	ggtaaCTTTCCTCACAGGTTTCTAC	T	7620.8	ggtaaCTTTCCTCACAGGTTTCTAT
iPLEX	3088309	ACGTTGGATGCTACACAATCAAAGACGCCC	ACGTTGGATGGAGGTCTGGTGAGAATAGTG	99	100	64.2	59	56.5		F	7808.1	aatACGCCCTCGGCTTACTTCTCTTC	C	8055.3	aatACGCCCTCGGCTTACTTCTCTTCC	A	8079.3	aatACGCCCTCGGCTTACTTCTCTTCA

## Sheet: Supplementary Table 3
Supplementary Table 2. HapMap Phase I Mitochondrial SNPs. SNPs in bold are SNPs that overlap between HapMap Phase I and the custom SNP panel associated with Hi-MC.
MT408
MT663
MT709
MT710
MT769
MT825
MT921
MT1018
MT1048
MT1189
MT1243
MT1438
MT1442
MT1598
MT1700
MT1719
MT1736
MT1738
MT1811
MT1888
MT2332
MT2352
MT2416
MT2706
MT2758
MT2768
MT2789
MT2857
MT2885
MT3010
MT3197
MT3308
MT3450
MT3480
MT3505
MT3547
MT3552
MT3594
MT3666
MT3693
MT3796
MT3843
MT3918
MT4104
MT4216
MT4580
MT4586
MT4655
MT4715
MT4769
MT4820
MT4824
MT4883
MT4917
MT4977
MT5036
MT5237
MT5285
MT5393
MT5442
MT5460
MT5465
MT5581
MT5773
MT5951
MT6071
MT6185
MT6221
MT6455
MT6473
MT6481
MT6587
MT6719
MT6989
MT7028
MT7175
MT7196
MT7256
MT7274
MT7624
MT7771
MT7867
MT8087
MT8206
MT8251
MT8414
MT8428
MT8468
MT8566
MT8584
MT8618
MT8655
MT8697
MT8701
MT8794
MT8829
MT8975
MT8994
MT9042
MT9055
MT9072
MT9123
MT9163
MT9221
MT9347
MT9377
MT9449
MT9477
MT9540
MT9554
MT9698
MT9755
MT9818
MT9950
MT10086
MT10115
MT10238
MT10321
MT10373
MT10398
MT10400
MT10463
MT10550
MT10586
MT10589
MT10664
MT10688
MT10810
MT10819
MT10873
MT10915
MT11176
MT11177
MT11251
MT11299
MT11467
MT11641
MT11674
MT11719
MT11812
MT11914
MT11947
MT11969
MT12007
MT12236
MT12308
MT12361
MT12372
MT12519
MT12612
MT12693
MT12705
MT12720
MT12810
MT13105
MT13263
MT13276
MT13368
MT13485
MT13506
MT13590
MT13617
MT13650
MT13708
MT13789
MT13803
MT13880
MT13886
MT13914
MT13928
MT14000
MT14088
MT14148
MT14152
MT14167
MT14178
MT14212
MT14284
MT14308
MT14318
MT14470
MT14560
MT14566
MT14668
MT14766
MT14769
MT14798
MT14905
MT14911
MT15043
MT15110
MT15115
MT15136
MT15204
MT15217
MT15218
MT15223
MT15244
MT15301
MT15326
MT15431
MT15452
MT15487
MT15508
MT15535
MT15607
MT15629
MT15670
MT15784
MT15824
MT15924
MT15928
MT16140
MT16148

## Sheet: Supplementary Table 4
Supplementary Table 3. CEU unclassified and discordant haplogroup comparisons. We list discordant calls from any of the pairwise comparisons by HapMap sample ID. Probable reasons for discordant calls are based on the custom SNP panel of 63 mitochondrial SNPs and the Hi-MC classification tree. Not all HapMap samples were included in the 1000 Genomes Project.
HapMap sample	Hi-MC assignment based on custom SNP panel genotyped in HapMap samples	Haplogrep2 assignment based on custom SNP panel genotyped in HapMap samples (based on 1000 Genomes data)	HapMap-reported assignment	Probable reason for discordance based on Hi-MC classification tree and custom SNP panel genotyped in HapMap samples
NA12005	U	K	K	Missing genotype for MT9055 which defines haplogroup U8b, but has MT1055G which defines haplogroup K, so should be K
		(K)
NA12144	L3	H2a2a1	H	Missing MT10398 and MT7028 genotypes, but has MT12705C (haplogroup R), MT11719G (haplogroup R0), and 14766C (haplogroup HV)
		(H)
NA12155	L3	H	H	Missing MT10398 genotype, but has 12705C (haplogroup R), MT11719G (haplogroup R0), 14766C (haplogroup HV), and 7028C (haplogroup H)
		(H)
NA12146	R	JT	H/V	Has MT12705C (defines haplogroup R). Does not have genotype for MT11719T (defines haplogroup R0) and is missing MT14766 (defines haplogroup HV)
		(-)
NA12875	H	JT	H	Has MT12705C (defines haplogroup R) but also has MT11251G (haplogroup JT).
		(-)
NA12892	L3	H2a2a1	H	Missing MT10398 and MT7028 genotypes; but has 12705C (haplogroup R), 11719G (haplogroup R0), and 14766C (haplogroup HV)
		(-)

## Sheet: Supplementary Table 5
Supplementary Table 4. YRI unclassified and discordant haplogroup comparisons. We list discordant calls from any of the pairwise comparisons by HapMap sample ID. Probable reasons for discordant calls are based on the custom SNP panel of 63 mitochondrial SNPs and the Hi-MC classification tree. Not all HapMap samples were included in the 1000 Genomes Project.
HapMap sample	Hi-MC assignment based on custom SNP panel genotyped in HapMap samples	Haplogrep2 assignment based on custom SNP panel genotyped in HapMap samples (based on 1000 Genomes data)	HapMap-reported assignment	Probable reason for discordance based on Hi-MC classification tree and custom SNP panel genotyped in HapMap samples
NA18504	Unclassified	H2a2a1g	L3e	Missing genotypes at 22 of 62 MT SNPs, but has MT1018G so probably haplogroup L3.
		(L3)
NA18507	Unclassified	L1	L1b	Missing MT13789 genotype which defines haplogroup L1.
		(L1b)
NA18854	Unclassified	H2a2a1	L3b	Missing genotypes at 15 MT SNPs including MT8468, but has MT825T, MT1018G, and 16362C define haplogroup L3b.
		(-)
NA18857	Unclassified	L1	L1b	Missing MT13789 genotype which defines haplogroup L1.
		(-)
NA18861	L0	L0	L1	In our data, the sample has genotypes for MT9347G, MT9042T, and MT5442C which all are haplogroup L0 MT SNPs. This sample also does not have 13789C which defines haplogroup L1 (we show 13789T for this sample). The discordance between the HapMap-reported assignment and Hi-MC cannot be explained with these data.
		(L0)
NA18863	Unclassified	H2a2a1g	L1	Missing genotypes at 25 of 62 MT SNPs.
		(-)
NA18871	Unclassified	H2a2a1g	L3b	Missing genotypes at 27 of 62 MT SNPs.
		(L3)
NA18914	Unclassified	H2a2a1g	L2	Missing genotypes at 37 of 62 MT SNPs.
		(-)
NA19127	L2′3′4′6	L2	L2	Missing genotype at MT10115 which defines haplogroup L2.
		(-)
NA19128	Unclassified	L1	L1b	Missing genotype at MT13789 which defines haplogroup L1.
		(-)
NA19129	L2′3′4′6	L2	L2	Missing genotype at MT10115 which defines haplogroup L2.
		(L2)
NA19137	L0	L0	L1	In our genotype data, this sample has MT9347G and 5442C which are haplogroup L0 MT SNPs. This sample also does not have MT13789C which defines haplogroup L1 (we show MT13789T; missing MT9042 genotype). The discordance between the HapMap-reported assignment and Hi-MC cannot be explained with these data.
		(L0)
NA19139	L0	L0	L1	In our genotype data, this sample has MT9347G and MT 9042T which are haplogroup L0 MT SNPs. This sample also does not have MT13789C which defines haplogroup L1 (we show MT13789T; missing MT5442 genotype). The discordance between the HapMap-reported assignment and Hi-MC cannot be explained with these data.
		(-)
NA19140	Unclassified	H2a2a1g	L3	Missing genotypes at 26 of 62 MT SNPs.
		(-)
NA19141	L3	Y	L3e
		(L3)
NA19142	L3	N	L3
		(-)
NA19143	L3	N10	L3b
		(L3)
NA19144	L3	N10	L3d
		(L3)
NA19145	L3	N10	L3
		(-)
NA19152	L2′3′4′6	L2	L2	Missing genotype at MT10115 which defines haplogroup L2.
		(L2)
NA19153	L3	N	L3d
		(L3)
NA19154	L2′3′4′6	L2	L2	Missing genotype at MT10115 which defines haplogroup L2.
		(-)
NA19159	L3	N	L3
		(-)
NA19161	L3	Y	L3
		(-)
NA19171	L3	N	L3e
		(L3)
NA19172	L3	N	L3
		(L3)
NA19173	L3	N	L3
		(L3)
NA19200	L3	N1'5	L3e
		(L3)
NA19204	L3	N1'5	L3e
		(L3)
NA19205	L3	N	L3e
		(-)
NA19206	Unclassified	L1	L1b	Missing genotype at MT13789 which defines haplogroup L1.
		(L1b)
NA19207	Unclassified	H2a2a1g	L1b	Missing genotypes at 24 of 62 MT SNPs including at MT13789 which defines haplogroup L1.
		(L1b)
NA19208	Unclassified	L1	L1b	Missing genotype at MT13789 which defines haplogroup L1.
		(-)
NA19209	Unclassified	H2a2a1g	L2	Missing genotype at MT8468C but has MT1011C, so should probably be haplogroup L2.
		(L2)
NA19210	Unclassified	L1	L1b	Missing genotype at MT13789 which defines haplogroup L1.
		(-)
NA19221	L3	N10	L3b
		(L3)
NA19222	L3	N10	L3b
		(L3)

## Sheet: Supplementary Table 6
Supplmentary Table 5. CHB/JPT unclassified and discordant haplogroup comparisons. We list discordant calls from any of the pairwise comparisons by HapMap sample ID. Probable reasons for discordant calls are based on the custom SNP panel of 63 mitochondrial SNPs and the Hi-MC classification tree. Not all HapMap samples were included in the 1000 Genomes Project.
HapMap sample	Hi-MC assignment based on custom SNP panel genotyped in HapMap samples	Haplogrep2 assignment based on custom SNP panel genotyped in HapMap samples (based on 1000 Genomes data)	HapMap-reported assignment	Probable reason for discordance based on Hi-MC classification tree and custom SNP panel genotyped in HapMap samples
NA18526	M	M9	E	Haplogroup E is sub-haplogroup is in haplogroup M branch; custom SNP panel doesn’t have SNPs to define haplogroup E. However, Haplogrep2 assignment in both HapMap genotyped samples and 1000 Genomes data support Hi-MC’s assignment.
		(M)
NA18529	R	R	B
		(-)
NA18537	R	R+16189	B
		(R)
NA18545	R	R+16189	B
		(R)
NA18550	M	M	E	Haplogroup E is sub-haplogroup is in haplogroup M branch; custom SNP panel doesn’t have SNPs to define haplogroup E. However, Haplogrep2 assignment in both HapMap genotyped samples and 1000 Genomes data support Hi-MC’s assignment.
		(M)
NA18552	R	R+16189	B
		(R)
NA18555	B5	R+16189	B
		(L3)
NA18561	HV	R+16189	B	Has MT SNP to define HV.
		(HV)
NA18563	N	N	B	Genotype at MT12705 is 'T' which is not consistent with R haplogroups or B subhaplogroups
		(N)
NA18564	B5	R+16189	B
		(L3)
NA18570	M	M9	E	Haplogroup E is sub-haplogroup is in haplogroup M branch; custom SNP panel doesn’t have SNPs to define haplogroup E. However, Haplogrep2 assignment in both HapMap genotyped samples and 1000 Genomes data support Hi-MC’s assignment.
		(M)
NA18571	R	R31	B
		(R)
NA18577	M	M	E	Haplogroup E is sub-haplogroup is in haplogroup M branch; custom SNP panel doesn’t have SNPs to define haplogroup E. However, Haplogrep2 assignment in both HapMap genotyped samples and 1000 Genomes data support Hi-MC’s assignment.
		(M)
NA18582	M	M	E	Haplogroup E is sub-haplogroup is in haplogroup M branch; custom SNP panel doesn’t have SNPs to define haplogroup E. However, Haplogrep2 assignment in both HapMap genotyped samples and 1000 Genomes data support Hi-MC’s assignment.
		(M)
NA18592	Unclassified	H2a2a1g	B	Missing genotypes at 23 of 62 SNPs. Has MT1018G, MT10398A, and MT12705C so at least haplogroup R.
		(R)
NA18593	M	M9	E	Haplogroup E is sub-haplogroup is in haplogroup M branch; custom SNP panel doesn’t have SNPs to define haplogroup E. However, Haplogrep2 assignment in both HapMap genotyped samples and 1000 Genomes data support Hi-MC’s assignment.
		(M)
NA18603	R	R+16189	B
		(R)
NA18608	M	M	E	Haplogroup E is sub-haplogroup is in haplogroup M branch; custom SNP panel doesn’t have SNPs to define haplogroup E. However, Haplogrep2 assignment in both HapMap genotyped samples and 1000 Genomes data support Hi-MC’s assignment.
		(M)
NA18609	R	R	B
		(R)
NA18612	N	N	B	Genotype at MT12705 is 'T' which is not consistent with R haplogroups or B subhaplogroups
		(N)
NA18620	R	R	B
		(R)
NA18622	M	M	C	MT SNP genotypes do not indicate this person would be haplogroup C, so defined as M.
		(M)
NA18624	R	R	B
		(R)
NA18635	Unclassified	H2a2a1g	E	Missing genotypes at 23 of 62 SNPs. Has MT825T, MT1018G and MT10400T which point to haplogroup M
		(M)
NA18636	M	M	E	Haplogroup E is sub-haplogroup is in haplogroup M branch; custom SNP panel doesn’t have SNPs to define haplogroup E. However, Haplogrep2 assignment in both HapMap genotyped samples and 1000 Genomes data support Hi-MC’s assignment.
		(M)
NA18637	M	M9	E	Haplogroup E is sub-haplogroup is in haplogroup M branch; custom SNP panel doesn’t have SNPs to define haplogroup E. However, Haplogrep2 assignment in both HapMap genotyped samples and 1000 Genomes data support Hi-MC’s assignment.
		(M)
NA18940	M	M	E	Haplogroup E is sub-haplogroup is in haplogroup M branch; custom SNP panel doesn’t have SNPs to define haplogroup E. However, Haplogrep2 assignment in both HapMap genotyped samples and 1000 Genomes data support Hi-MC’s assignment.
		(M)
NA18942	M	M	C	MT SNP genotypes do not indicate this person would be haplogroup C, so defined as M.
		(M)
NA18943	M	M	E	Haplogroup E is sub-haplogroup is in haplogroup M branch; custom SNP panel doesn’t have SNPs to define haplogroup E. However, Haplogrep2 assignment in both HapMap genotyped samples and 1000 Genomes data support Hi-MC’s assignment.
		(M)
NA18944	M	D4e4	D	Has MT10400T consistent with M but MT4883C and missing MT5178 (needed for D in Hi-MC).
		(D4)
NA18947	R	R+16189	B
		(R)
NA18948	R	R+16189	B
		(R)
NA18949	B4b'd'e	R+16189	B	Has 15535T and should be B4b'd'e.
		(B4b'd'e)
NA18952	M	M	E	Haplogroup E is sub-haplogroup is in haplogroup M branch; custom SNP panel doesn’t have SNPs to define haplogroup E. However, Haplogrep2 assignment in both HapMap genotyped samples and 1000 Genomes data support Hi-MC’s assignment.
		(M)
NA18953	M	M	E	Haplogroup E is sub-haplogroup is in haplogroup M branch; custom SNP panel doesn’t have SNPs to define haplogroup E. However, Haplogrep2 assignment in both HapMap genotyped samples and 1000 Genomes data support Hi-MC’s assignment.
		(M)
NA18956	Unclassified	H2a2a1g	E	Missing genotypes at 33 of 62 SNPs.
		(M)
NA18960	N	N	B	Has MT10398A, but NOT MT12705C so not haplogroup R branch
		(N)
NA18961	B5	R+16189	B
		(B5)
NA18965	M	M	E	Has MT10398G and MT10400T so probably haplogroup M. Has MT1719A and MT15043A which define N1a'e'I, however these SNPs are not unique to this haplogroup like MT10400T is to haplogroup M
		(M)
NA18969	M	M9	E	Haplogroup E is sub-haplogroup is in haplogroup M branch; custom SNP panel doesn’t have SNPs to define haplogroup E. However, Haplogrep2 assignment in both HapMap genotyped samples and 1000 Genomes data support Hi-MC’s assignment.
		(M)
NA18970	R	R+16189	B
		(R)
NA18971	B5	R+16189	B
		(B5)
NA18973	N	N	B
		(N)
NA18974	L3	Y	B	Has MT10398G; does not have MT12705C for haplogroup R.
		(L3)
NA18975	R	JT	B
		(R)
NA18976	N	N	B	Has MT10398A, but NOT MT12705C so not in haplogroup 'R' branch
		(N)
NA18980	D4	H2a2a1g	D
		(D4)
NA18990	M	M9	E	Haplogroup E is sub-haplogroup is in haplogroup M branch; custom SNP panel doesn’t have SNPs to define haplogroup E. However, Haplogrep2 assignment in both HapMap genotyped samples and 1000 Genomes data support Hi-MC’s assignment.
		(M)
NA18991	L2'3'4'6	N	B	Missing MT3594 genotype, but has MT1018G and MT10398A, so at least haplogroup N. Has MT12705T which suggests not haplogroup R.
		(N)
NA18994	M	M47	C	MT SNP genotypes do not indicate this person would be haplogroup C, so defined as M
		(M)
NA18997	Unclassified	H2a2a1	A	Missing 32 out of 62 MT SNPs
		(A)
NA18999	M	M	E	Haplogroup E is sub-haplogroup is in haplogroup M branch; custom SNP panel doesn’t have SNPs to define haplogroup E. However, Haplogrep2 assignment in both HapMap genotyped samples and 1000 Genomes data support Hi-MC’s assignment.
		(M)
NA19000	D4	D4	B	All SNPs genotypes support 'D4' classification
		(D4)
NA19003	M	M	E	Haplogroup E is sub-haplogroup is in haplogroup M branch; custom SNP panel doesn’t have SNPs to define haplogroup E. However, Haplogrep2 assignment in both HapMap genotyped samples and 1000 Genomes data support Hi-MC’s assignment.
		(M)
NA19005	M	M	C	MT SNP genotypes do not indicate this person would be haplogroup C, so defined as M
		(M)
NA19007	M	D1g1a	E	Haplogroup E is sub-haplogroup is in haplogroup M branch; custom SNP panel doesn’t have SNPs to define haplogroup E. However, Haplogrep2 assignment in both HapMap genotyped samples and 1000 Genomes data support Hi-MC’s assignment.
		(M)
NA19012	N	N	Unknown
		(N)
